# Supplementary material for: A Supramolecular Hydrogel Enabled by the Synergy of Hydrophobic Interaction and Quadruple Hydrogen Bonding
Source: MDPI journal article supplement (doi:10.3390/gels8040244), 2022-04-14
Supplement: s1 [file s1]

## Article

# A Supramolecular Hydrogel Enabled by the Synergy of Hydrophobic Interaction and Quadruple Hydrogen Bonding

Liangmei Lu <sup>1,†</sup>, Wen Zhou <sup>2,†</sup>, Zhuzuan Chen <sup>1</sup>, Yang Hu <sup>1</sup>, Yu Yang <sup>1,\*</sup>, Guangzhao Zhang <sup>3,\*</sup> and Zhuohong Yang <sup>1,\*</sup>

<sup>1</sup> College of Materials and Energy, Guangdong Laboratory for Lingnan Modern Agriculture, South China Agricultural University, Guangzhou 510642, China liangmei1010@stu.scau.edu.cn (L.L.); 20203138220@stu.scau.edu.cn (Z.C.); huyang0303@scau.edu.cn (Y.H.)

<sup>2</sup> Department of Neurosurgery, The Second Affiliated Hospital, Medical College of Shantou University, 69 North Dongxia Road, Shantou, 515041, China; wenzhou@stu.edu.cn

<sup>3</sup> Department of Materials Science & Engineering, Guangdong Provincial Key Laboratory of Energy Materials for Electric Power, Southern University of Science and Technology, Shenzhen 518055, China;

\* Correspondence: yu.yang@scau.edu.cn (Y.Y.); zhanggz@sustech.edu.cn (G.Z.); yangzhuohong@scau.edu.cn (Z.Y.)

† These authors contributed equally to this work.

## Supporting information

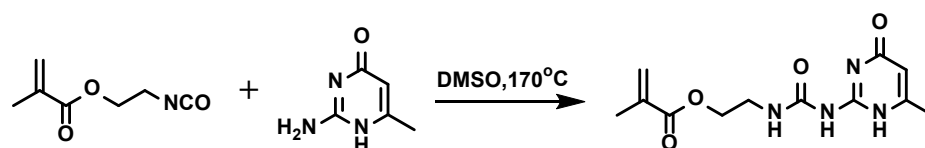

**Scheme S1.** Synthesis of UPy-MA monomer.

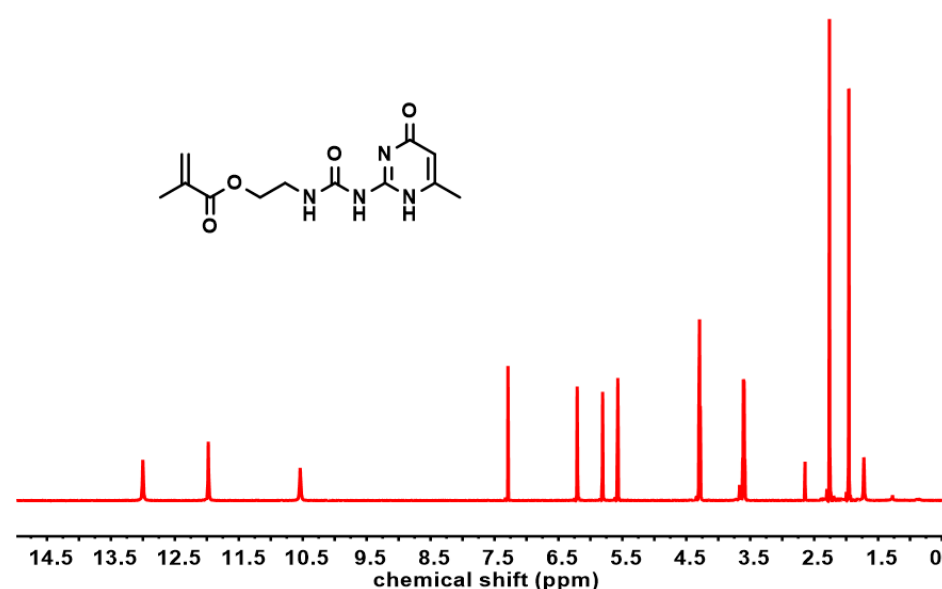

**Figure S1.** <sup>1</sup>H NMR spectrum of UPy-NMA monomer.

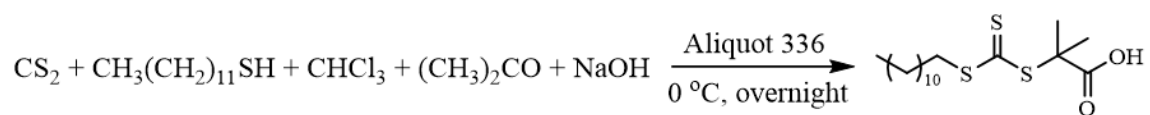

**Figure S2.** Synthesis of RAFT agent CTA.

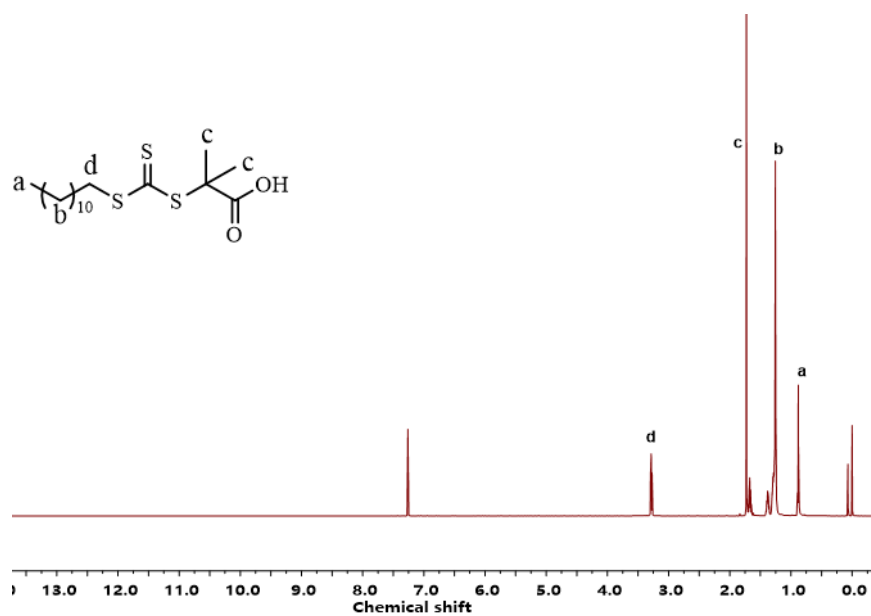

**Figure S3.** The  $^1\text{H}$  NMR spectrum of CTA.

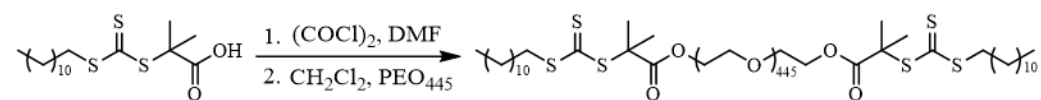

**Figure S4.** The synthesis of macro-RAFT agent (CTA-PEO-CTA).

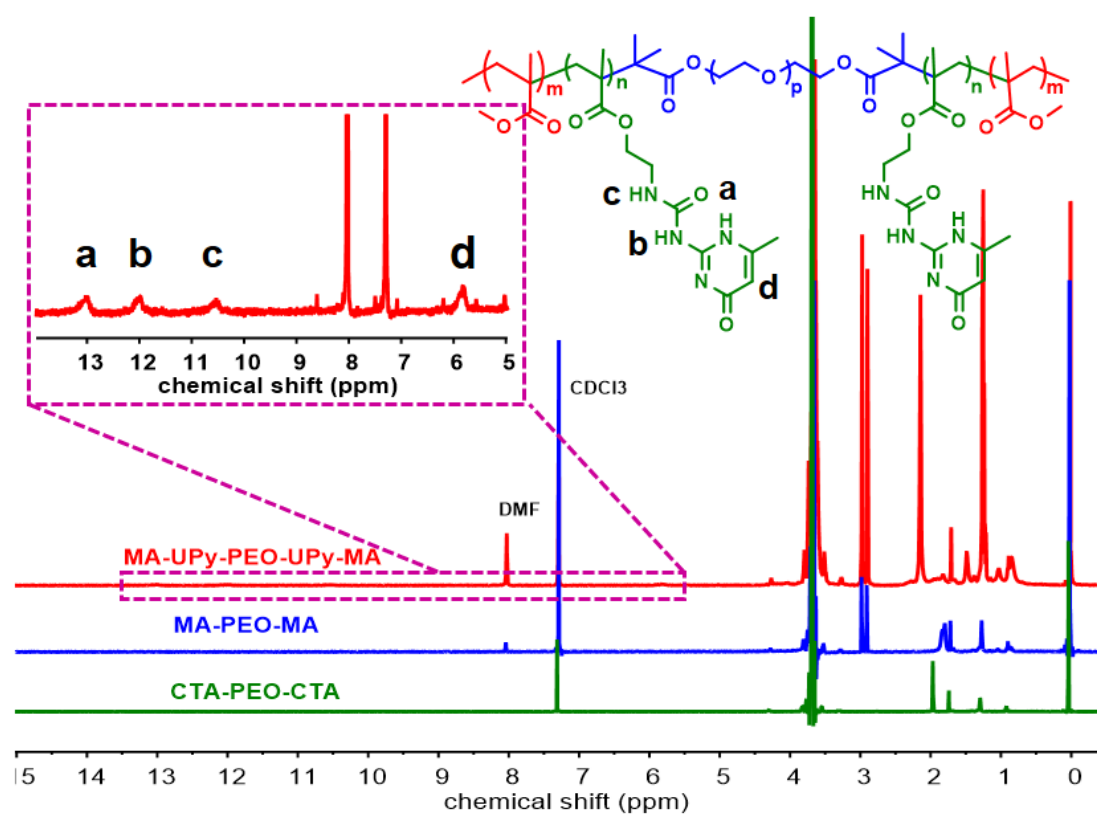

Figure S5. Characterizing the supramolecular polymers using  $^1\text{H}$  NMR.
